# Supplementary material
Source: MDPI journal article supplement (https://www.mdpi.com/2073-4344/9/1/95)

# Supplementary Materials: Improving Productivity of Multiphase Flow Aerobic Oxidation using a Tube-in-Tube Membrane Contactor

Michael Burkholder <sup>1</sup>, Stanley E. Gilliland III <sup>1,2</sup>, Adam Luxon <sup>1</sup>, Christina Tang <sup>1,\*</sup> and B. Frank Gupton <sup>1,\*</sup>

<sup>1</sup> Department of Chemical and Life Science Engineering, Virginia Commonwealth University, 601 W. Main St., Richmond, VA 23284-3028, USA; mbburkholder@vcu.edu (M.B.); gillilandse@vcu.edu (S.E.G.III); aluxon@vcu.edu (A.L.)

<sup>2</sup> Venebio Group, LLC, 7400 Beauford Springs Drive, Suite 300 Richmond, VA 23225, USA

\* Correspondence: ctang2@vcu.edu (C.T.); bfgupton@vcu.edu (B.F.G.); Tel: +1-804-827-1917 (C.T.); +1-804-828-4799 (B.F.G.)

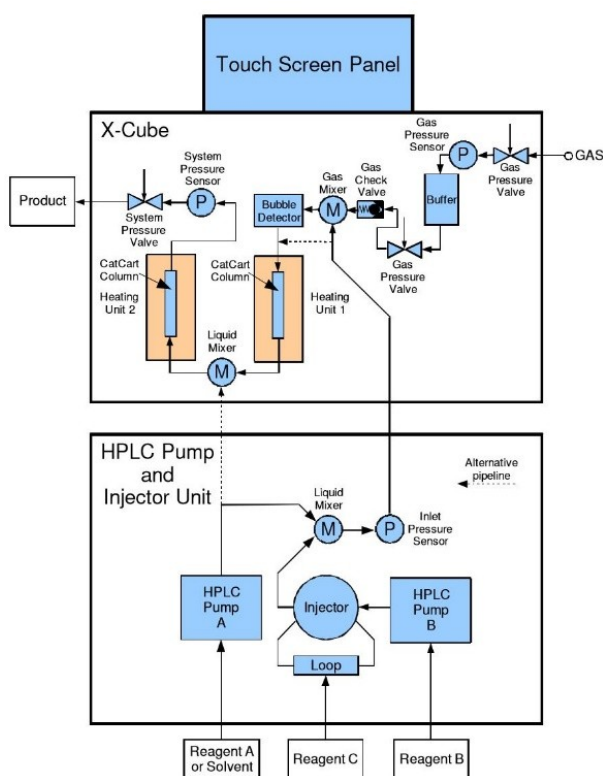

**Figure S1.** The schematic diagram of the X-Cube™ reactor's components (provided by ThalesNano).

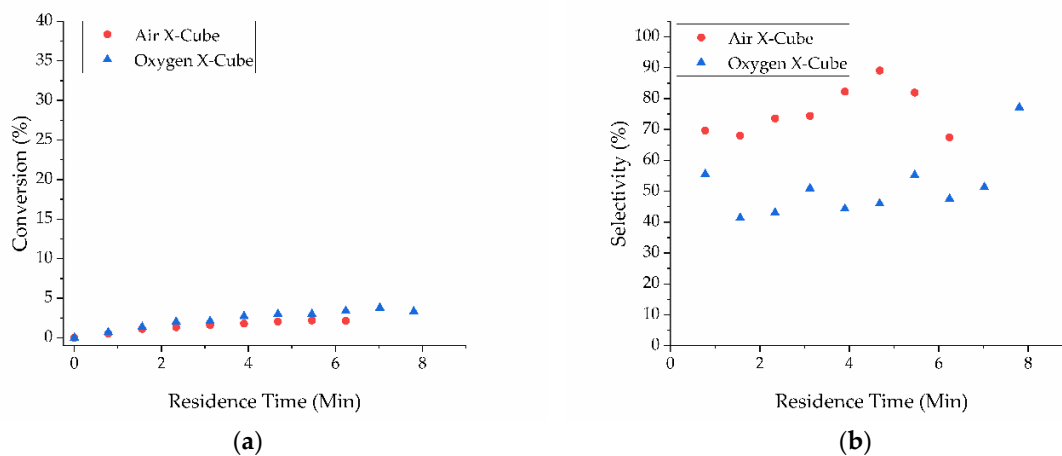

**Figure S2.** (a) Conversion of benzyl alcohol; (b) selectivity to benzaldehyde for the X-Cube™ and external pump system for both air (red circles) and pure oxygen (blue triangles) at 2.8 bar.

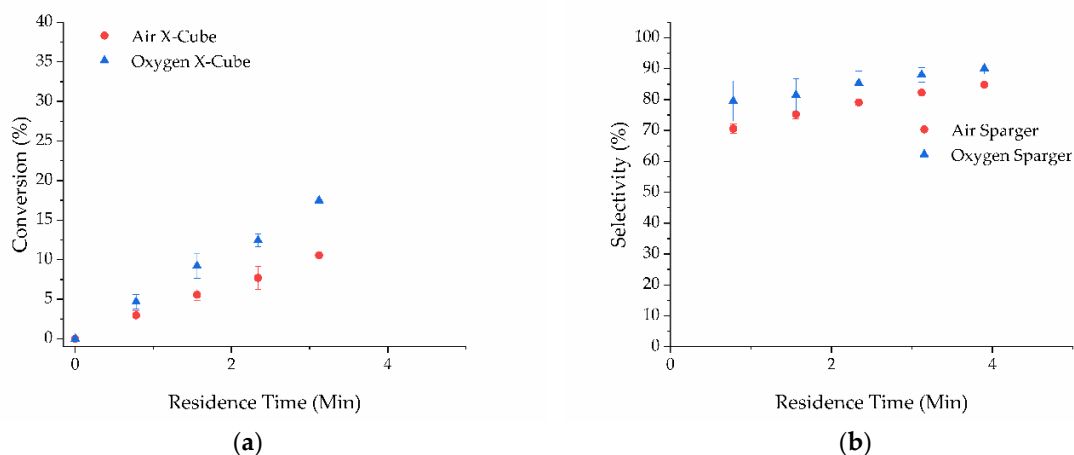

**Figure S3.** (a) Conversion of benzyl alcohol; (b) selectivity to benzaldehyde for the X-Cube™ and external pump system for both air (red circles) and pure oxygen (blue triangles) at 9.7 bar.

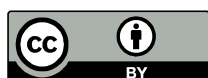

Supplement: s1 [file s1]
